# Supplementary material
Source: Springer Nature journal article supplement (https://www.springermedizin.de/resource/supplementary/13256_2013_2693_MOESM5_ESM.pdf/9651234)

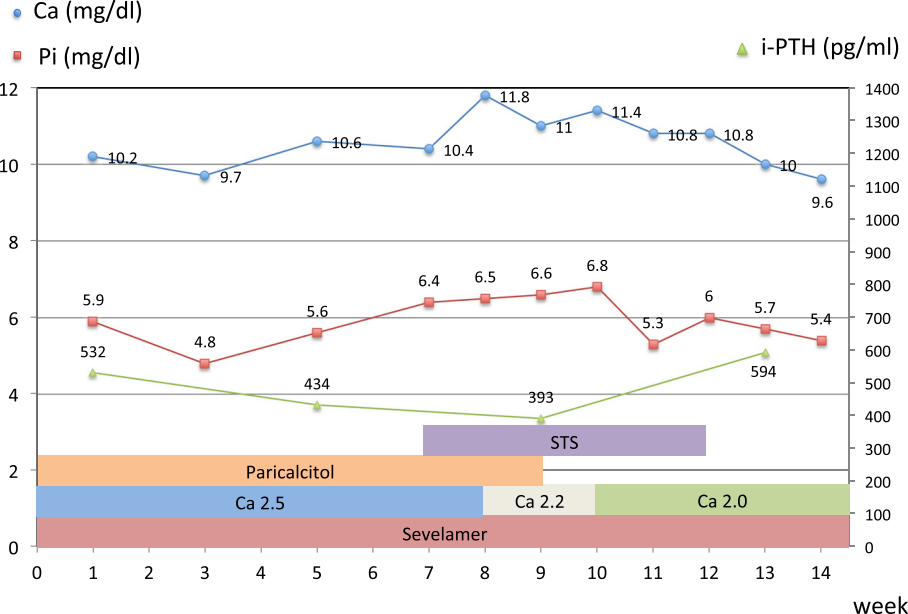

Supplement: MOESM5 [file 9651234]
